# Supplementary material for: A high efficiency biological system for treatment of coal gasification wastewater – a key in-depth technological research
Source: Royal Society of Chemistry journal article supplement (doi:10.1039/c5ra04215a), 2015-01-01

### Supporting Information

**Table S1. Ozonation-aerobic fluidized bed operating conditions.**

| Running Stage | Operating time (days) | Ozonation               |                 |                           | Aerobic Fluidized Bed |                  |
|---------------|-----------------------|-------------------------|-----------------|---------------------------|-----------------------|------------------|
|               |                       | Ozone flow rate (L/min) | COD conc.(mg/L) | Total phenol conc. (mg/L) | HRT (hr)              | COD conc. (mg/L) |
| 1             | 1-103                 | 2                       | 200-300         | 20-30                     | 125                   | 150-160          |
| 2             | 104-124               | 1                       | 180-250         | 20-30                     | 125                   | 150-160          |
| 3             | 125-220               | 1.5                     | 180-250         | 20-30                     | 86                    | 150-160          |

**Table S2. Ozonation intermittent test data**

| Time<br>(days) | Influent COD<br>(mg/L) | Effluent COD<br>(mg/L) | COD removal<br>(%) | Influent Total<br>phenol<br>(mg/L) | Effluent Total<br>phenol<br>(mg/L) |
|----------------|------------------------|------------------------|--------------------|------------------------------------|------------------------------------|
| 1              | 204                    | 117                    | 42.6               | 27.1                               | Undetected                         |
| 4              | 308                    | 213                    | 30.8               | 29.7                               | Undetected                         |
| 12             | 256                    | 152                    | 40.6               | 29.8                               | Undetected                         |
| 37             | 204                    | 121                    | 40.7               | 29.9                               | Undetected                         |
| 45             | 256                    | 150                    | 41.4               | 31.6                               | Undetected                         |
| 58             | 268                    | 154                    | 42.5               | 26.3                               | Undetected                         |
| 74             | 247                    | 152                    | 38.5               | 27.4                               | Undetected                         |
| 91             | 198                    | 118                    | 40.4               | 30.1                               | Undetected                         |
| 104            | 221                    | 152                    | 31.2               | 31.1                               | Undetected                         |
| 114            | 212                    | 148                    | 30.2               |                                    | Undetected                         |
| 127            | 190                    | 111                    | 41.6               | 30.3                               | Undetected                         |
| 130            | 163                    | 85                     | 47.9               | 36.4                               | Undetected                         |
| 133            | 205                    | 118                    | 42.4               | 31.2                               | Undetected                         |
| 136            | 255                    | 146                    | 42.7               | 25.1                               | Undetected                         |
| 145            | 266                    | 186                    | 30.1               | 26.6                               | Undetected                         |
| 152            | 263                    | 181                    | 31.2               | 27.2                               | Undetected                         |
| 164            | 265                    | 150                    | 43.4               | 34.2                               | Undetected                         |
| 173            | 213                    | 153                    | 28.2               | 32.9                               | Undetected                         |
| 187            | 223                    | 148                    | 33.6               | 17.6                               | Undetected                         |
| 200            | 240                    | 156                    | 35.0               | 24.8                               | Undetected                         |
| 209            | 192                    | 142                    | 26.0               | 19.5                               | Undetected                         |

**Table S3. Ozonation-aerobic fluidized bed NH<sub>3</sub>-N removal trends**

| Operating time<br>(days) | Influent NH <sub>3</sub> -N<br>(mg/L) | Effluent NH <sub>3</sub> -N<br>(mg/L) | NH <sub>3</sub> -N removal rate<br>(%) |
|--------------------------|---------------------------------------|---------------------------------------|----------------------------------------|
| 152                      | 22.7                                  | 0.36                                  | 98.4                                   |
| 164                      | 28.7                                  | 0.27                                  | 99.1                                   |
| 173                      | 26.4                                  | 0.45                                  | 98.3                                   |
| 187                      | 17.6                                  | 0.13                                  | 99.3                                   |
| 200                      | 27.8                                  | 0.21                                  | 99.2                                   |

**Figure S1.**

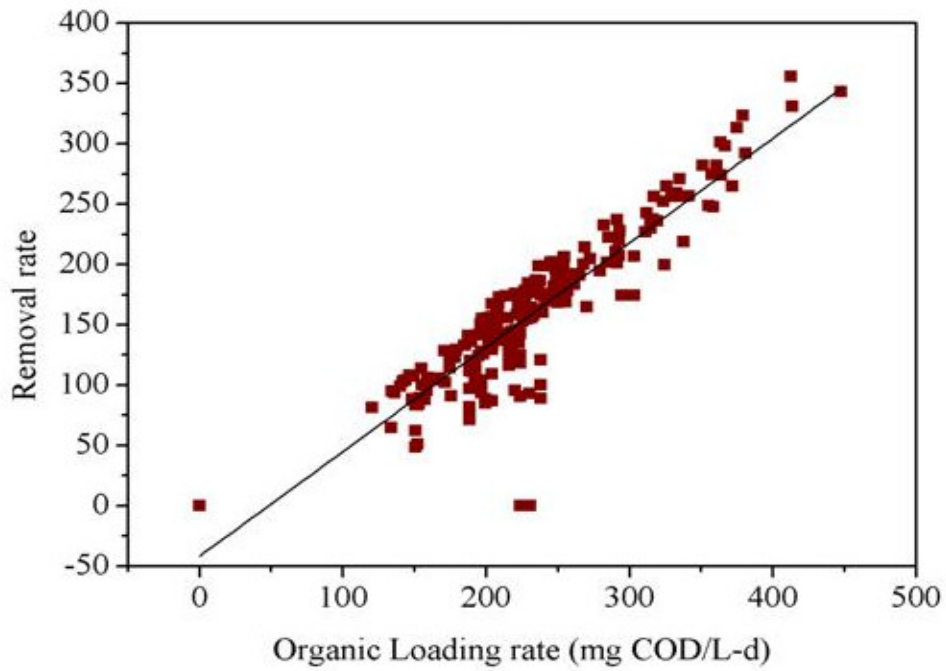

Supplement: c5ra04215a1.pdf [file c5ra04215a1.pdf]
